# Supplementary material
Source: PubMed Central journal article supplement (PMC6450517)
Supplement: f-75-00307-sup1.pdf [file f-75-00307-sup1.pdf]

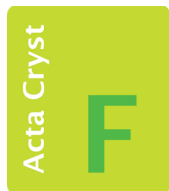

STRUCTURAL BIOLOGY  
COMMUNICATIONS

**Volume 75 (2019)**

**Supporting information for article:**

**Igni18, a novel metallo-hydrolase from the hyperthermophilic archaeon *Ignicoccus hospitalis* KIN4/l: cloning, expression, purification and X-ray analysis**

**Stefanie Kobus, Pablo Perez-Garcia, Astrid Hoepfner, Nicholas Holzschek, Filip Kovacic, Wolfgang R. Streit, Karl-Erich Jaeger, Jennifer Chow and Sander H. J. Smits**

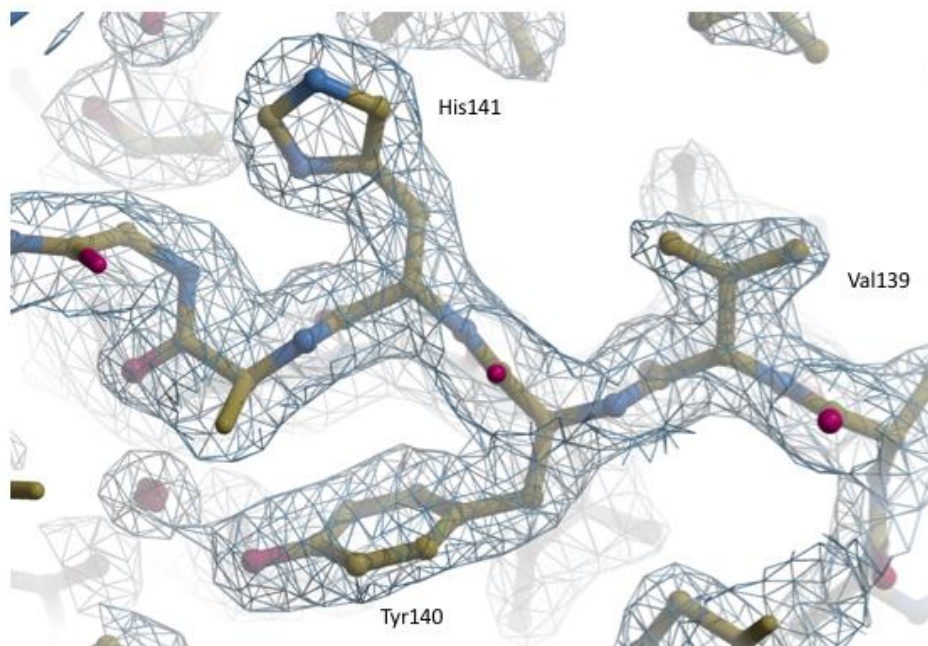

**Figure S1** Preliminary chain trace through a section of the electron density map of the Igni18 protein from *Ignicoccus hospitalis*. The electron density unambiguously allows the placement of sequence and side chain of the Igni18 protein. Highlighted is the section His141-Val139. Further refinement is currently ongoing. The Figure was prepared using COOT.
